# Supplementary material
Source: PubMed Central journal article supplement (PMC3392991)

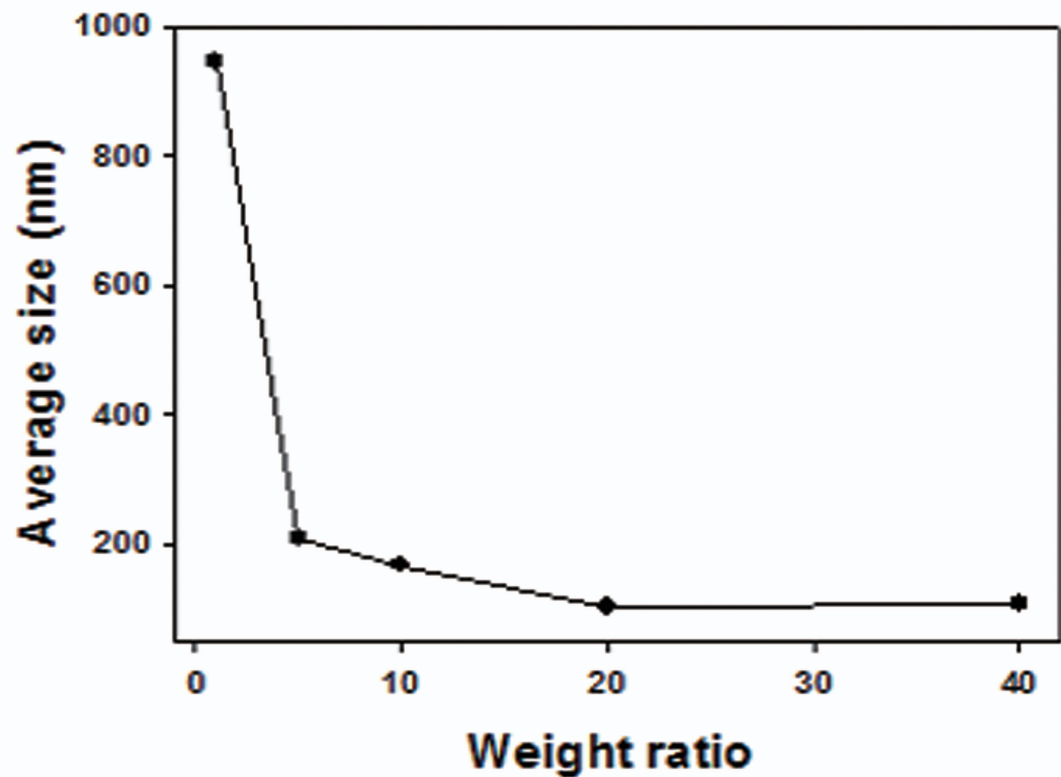

Supplement: mt201262x1.pdf [file mt201262x1.pdf]

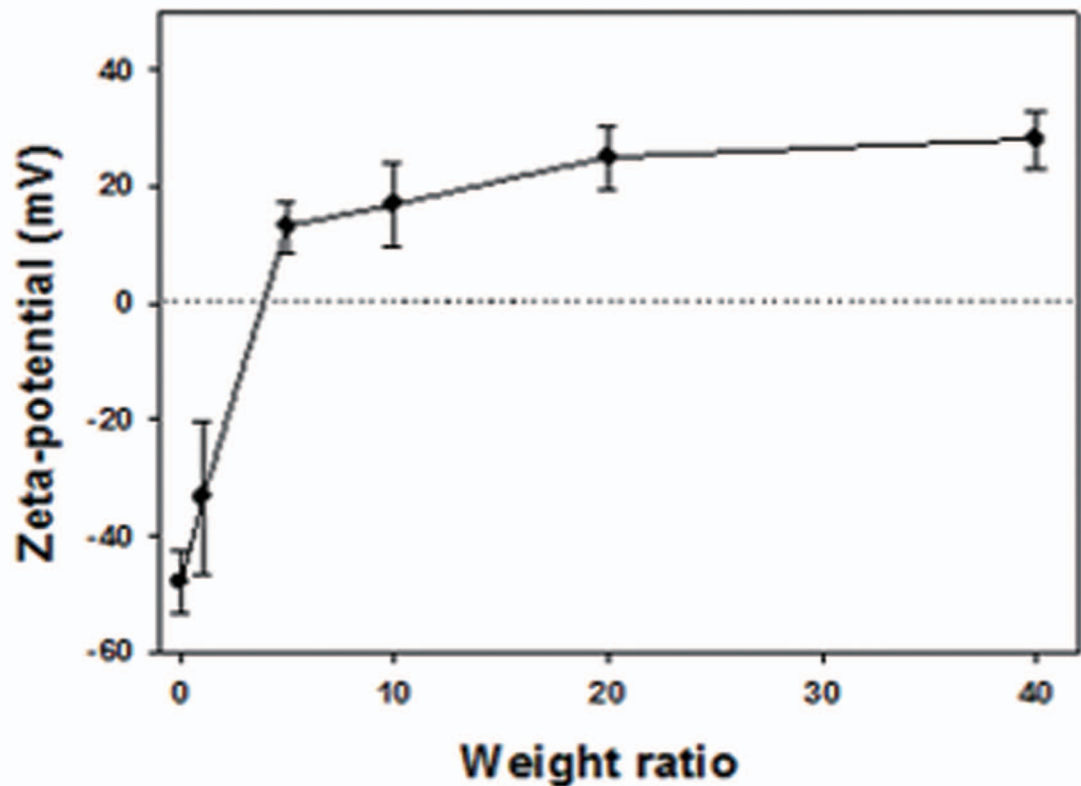

Supplement: mt201262x2.pdf [file mt201262x2.pdf]

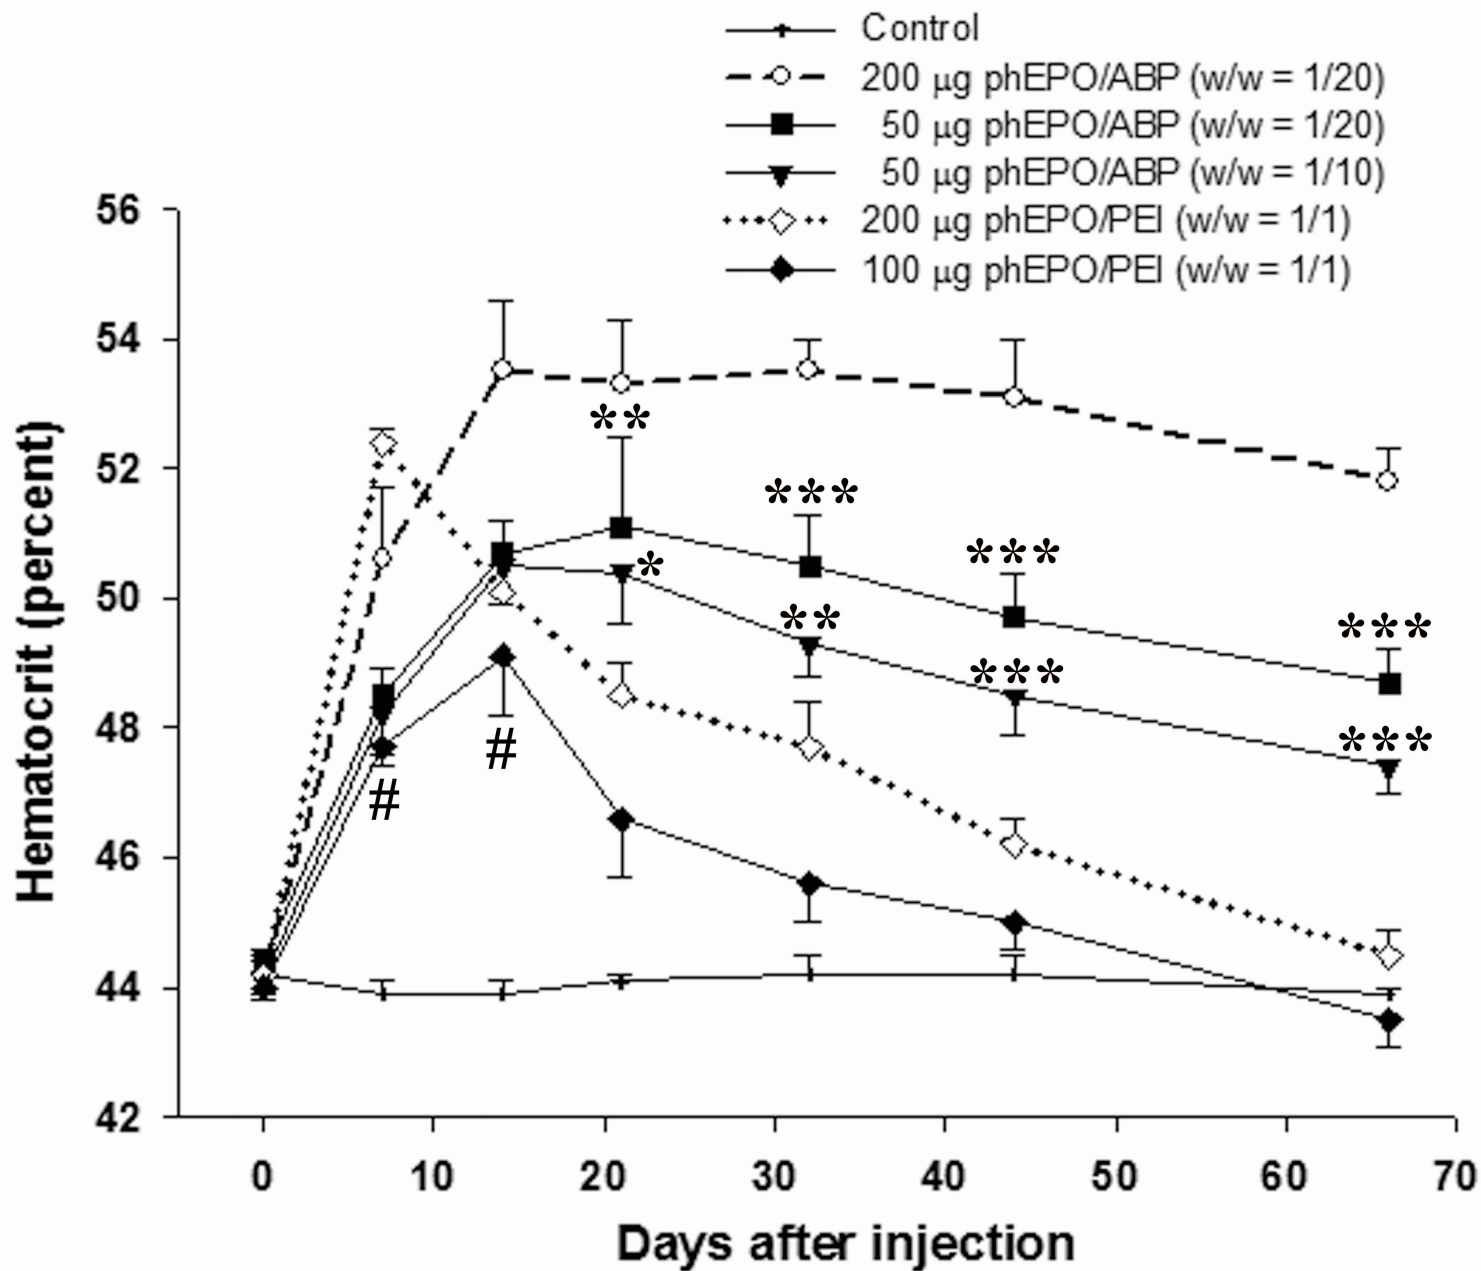

Supplement: mt201262x3.pdf [file mt201262x3.pdf]

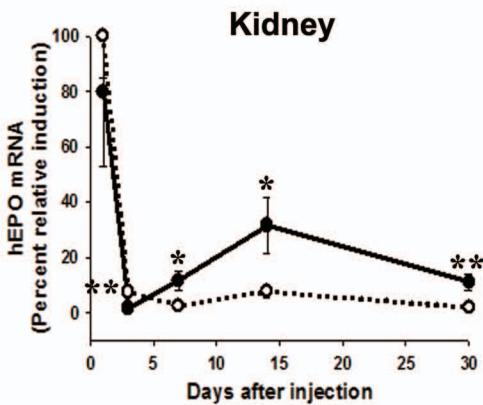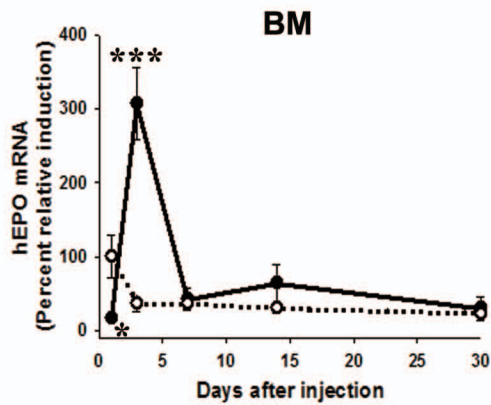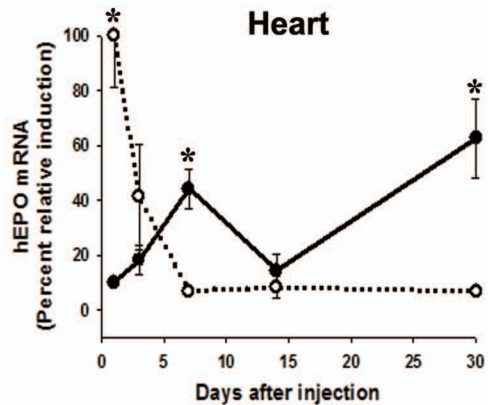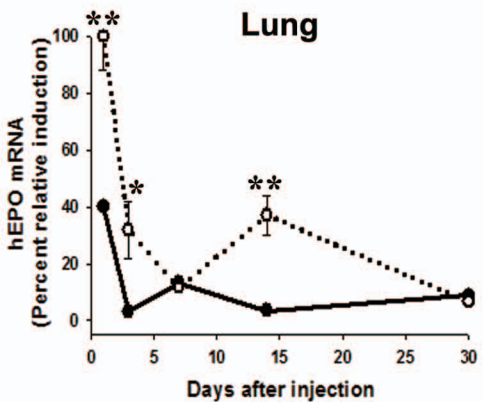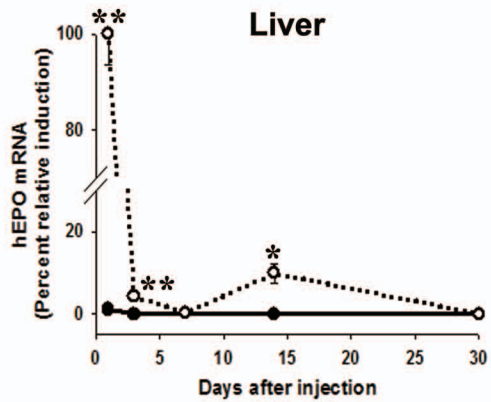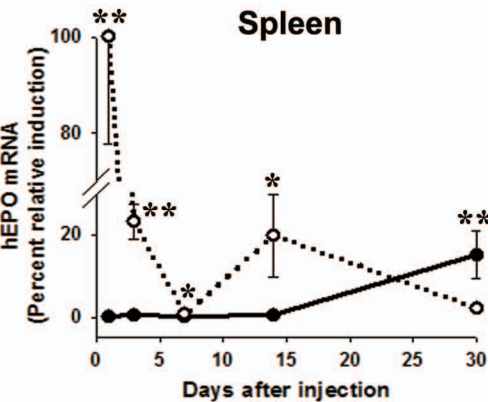

Supplement: mt201262x4.pdf [file mt201262x4.pdf]

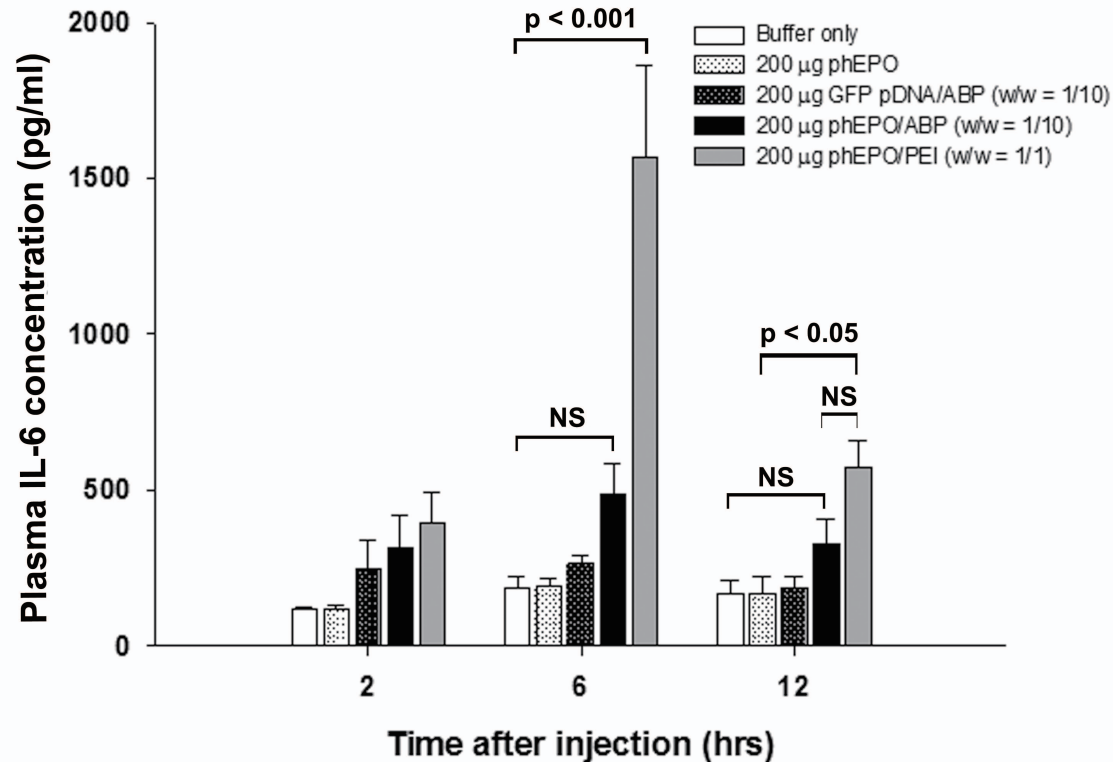

Supplement: mt201262x5.pdf [file mt201262x5.pdf]
